# Supplementary material for: Deathly Silent: Exploring the Global Lack of Data Relating to Stranded Cetacean Euthanasia
Source: MDPI journal article supplement (doi:10.3390/ani11051460), 2021-05-19
Supplement: s1 [file s1]

**Table S1.** Marine mammal euthanasia via chemical methods (injection and inhalation), including details of methods and time to death (TTD) as reported in the peer-reviewed literature between 1980 and 2020.

| Taxon                 | Species                 | Method                  | Length of animal (m) | Mass of animal (kg) | Chemical agent             | Parenteral injection route | Injection location | Dose                             | TTD (mins) | Ref. |
|-----------------------|-------------------------|-------------------------|----------------------|---------------------|----------------------------|----------------------------|--------------------|----------------------------------|------------|------|
| Cetacean              | Cetacean                | Chemical                |                      |                     | Barbiturate                |                            |                    |                                  |            | [14] |
| Delphinid             | Bottlenose dolphin      | Chemical                |                      |                     | Barbiturates               | IV                         |                    |                                  |            | [3]  |
| Delphinid             | Common dolphin          | Chemical                | 1.91                 |                     | Pentobarbitone<br>Euthatol | IP                         | Peritoneal cavity  | 60 mL                            | 20         | [15] |
| Delphinid             | Common dolphin          | Chemical                |                      |                     | Barbiturates               | IV                         |                    |                                  |            | [3]  |
| Delphinid             | White-beaked dolphin    | Chemical                | 2.66                 | 273.7               | Midazolam                  | IM                         |                    | 0.08 mg/kg                       | 20         | [59] |
|                       |                         |                         |                      |                     | Acepromazine               | IM                         |                    | 0.8 mg/kg                        |            |      |
|                       |                         |                         |                      |                     | Xylazine                   | IM                         |                    | 1.6 mg/kg                        |            |      |
| Delphinid (Blackfish) | False Killer whale      | Ballistics,<br>Chemical |                      |                     | Pentobarbitone             |                            |                    |                                  |            | [16] |
| Delphinid (Blackfish) | Long-finned pilot whale | Chemical                |                      |                     | T61                        | IV                         | Dorsal fin         | 0.14 cc per pound of body weight |            | [38] |
| Delphinid (Blackfish) | Long-finned pilot whale | Chemical                |                      |                     | Pentobarbital              |                            |                    |                                  |            | [39] |
| Delphinid (Blackfish) | Long-finned pilot whale | Chemical                | 5.54, 5.55           |                     | Etorphine                  |                            |                    | 2.45 mg/mL                       |            | [40] |
|                       |                         |                         |                      |                     | Acepromazine               |                            |                    | 10 mg/mL                         |            |      |
| Delphinid (Blackfish) | Melon-headed whale      | Chemical                | 2.12, 2.40, 2.48     | 125, 200, 125       | Xylazine                   | IM                         | Epaxial muscles    | 0.5 mg/kg                        | 8          | [41] |
|                       |                         |                         |                      |                     | Ketamine                   | IM                         | Epaxial muscles    | 2.5 mg/kg                        |            |      |
| Delphinid (Blackfish) | Pilot whale             | Chemical                | 2.1                  |                     | Diazepam                   | IM                         |                    | 20 mg                            |            | [43] |
|                       |                         |                         |                      |                     | Sodium pentobarbital       | IH                         |                    | 23,400 mg                        |            |      |
|                       |                         |                         |                      |                     | Phenytoin                  | IH                         |                    | 300 mg                           |            |      |
| Delphinid (Blackfish) | Pilot whale             | Chemical                | 2.97                 |                     | Meperidine                 | IM                         |                    | 100 mg                           |            | [43] |

|                          |                    |          |      |      |                          |    |                 |      |
|--------------------------|--------------------|----------|------|------|--------------------------|----|-----------------|------|
| Delphinid<br>(Blackfish) | Pilot whale        | Chemical | 3.58 |      | Sodium pentobarbital     | IC | 19,500 mg       | [43] |
|                          |                    |          |      |      | Phenytoin                | IC | 2500 mg         |      |
|                          |                    |          |      |      | Xylazine                 | IM | 6000 mg         |      |
| Delphinid<br>(Blackfish) | Pilot whale        | Chemical | 3.52 |      | Acepromazine             | IM | 100 mg          | [43] |
|                          |                    |          |      |      | Sodium pentobarbital     |    | 46,800 mg       |      |
|                          |                    |          |      |      | Phenytoin                |    | 6000 mg         |      |
| Delphinid<br>(Blackfish) | Pilot whale        | Chemical | 3.59 |      | Xylazine                 | IM | 1000 mg         | [43] |
|                          |                    |          |      |      | Acepromazine             | IM | 100 mg          |      |
|                          |                    |          |      |      | Sodium pentobarbital     |    | 46,800 mg       |      |
| Delphinid<br>(Blackfish) | Pilot whale        | Chemical | 3.5  |      | Phenytoin                |    | 6000 mg         | [43] |
|                          |                    |          |      |      | Sodium pentobarbital     |    | 46,800 mg       |      |
|                          |                    |          |      |      | Phenytoin                |    | 6000 mg         |      |
| Delphinid<br>(Blackfish) | Pilot whale        | Chemical | 3.49 |      | Xylazine                 | IM | 6000 mg         | [43] |
|                          |                    |          |      |      | Acepromazine             | IM | 100 mg          |      |
|                          |                    |          |      |      | T61                      | IV |                 |      |
| Delphinid<br>(Blackfish) | Pygmy killer whale | Chemical | 2.46 |      |                          |    |                 | [53] |
| Kogiid                   | Pygmy sperm whale  | Chemical | 3.1  |      | Midazolam                | IM | 50 mg (5 mg/mL) | [54] |
| Mustelid                 | Southern sea otter | Chemical | 0.45 | 1.45 | Pentobarbital (Euthasol) | IV |                 | [56] |
|                          |                    |          |      |      | Fentanyl citrate,        | IM |                 |      |
|                          |                    |          |      |      | Diazepam                 |    |                 |      |
| Mustelid                 | Southern sea otter | Chemical |      |      | Pentobarbital sodium     | IV |                 | [57] |
|                          |                    |          |      |      | Pentobarbital            | IV | 2340 mg         |      |
|                          |                    |          |      |      | Pentobarbital            | IV | 5850 mg         |      |

|           |                |                      |      |      |                                                |            |                                            |                                |    |      |
|-----------|----------------|----------------------|------|------|------------------------------------------------|------------|--------------------------------------------|--------------------------------|----|------|
| Mysticete | Fin whale      | Chemical             | 10.5 |      | Xylazine                                       | IV         | Major vein close to heart/thorax           | 5000 mg                        | 60 | [17] |
|           |                |                      |      |      | T61                                            | IV         | Major vein close to heart/thorax           | 100 mL                         |    |      |
|           |                |                      |      |      | KCl                                            | IV         | Major vein close to heart/thorax           | 1200 mmol/600 mL sterile water |    |      |
| Mysticete | Fin whale      | Chemical, Inhalation | 13.5 |      | Pentobarbital, T61                             | Inhalation | Blowhole                                   | 60 mL (390 mg/mL)              | 40 | [18] |
|           |                |                      |      |      | T61                                            | IV         | Fluke                                      | 2 x 60mL                       |    |      |
| Mysticete | Gray whale     | Chemical             | 8.22 |      | Pentobarbital                                  | IV         | Ventral margin of peduncle                 | 500 cc                         |    | [19] |
| Mysticete | Gray whale     | Chemical             | 8–12 |      | Midazolam                                      | IM         |                                            | 0.02 mg/kg                     |    | [20] |
|           |                |                      |      |      | Pentothal sodium                               | IV         | Superficial caudal peduncle veins          |                                |    |      |
| Mysticete | Humpback whale | Ballistics, Chemical |      |      | Detomidine, Midazolam, Butorphanol Barbiturate | IM         | 12-inch dart                               |                                |    | [36] |
|           |                |                      |      |      |                                                | IV, IP     |                                            |                                |    |      |
| Mysticete | Humpback whale | Chemical             | 8.78 | 9500 | Midazolam                                      | IM         | Left epaxial muscle cranial to scapula     | 400 mg (0.04 mg/kg)            | 99 | [37] |
|           |                |                      |      |      | Acepromazine                                   | IT         | Caudal to right pectoral fin               | 1950 mg (0.2 mg/kg)            |    |      |
|           |                |                      |      |      | Xylazine                                       | IV         | Right pectoral fin between ulna and radius | 31,000 mg (3.4 mg/kg)          |    |      |

|           |                |          |      |        |                             |                     |                           |                                 |     |      |
|-----------|----------------|----------|------|--------|-----------------------------|---------------------|---------------------------|---------------------------------|-----|------|
|           |                |          |      |        | KCl                         | IC, IV              | Near heart                | 100 mg/kg (1.3 mmol/kg)         |     |      |
| Mysticete | Humpback whale | Chemical | 8.3  | 8000   | Midazolam                   | IM                  |                           | 415 mg (0.05 mg/kg)             | 138 | [37] |
|           |                |          |      |        | Acepromazine                | IM                  |                           | 2100 mg (0.25 mg/kg)            |     |      |
|           |                |          |      |        | Xylazine                    | IM, Retrobulbar, IV |                           | 30,000 mg (3.5 mg/kg)           |     |      |
|           |                |          |      |        | KCl                         | IT, IV              |                           | 220 mg/kg (3 mmol/kg)           |     |      |
| Mysticete | Humpback whale | Chemical | 9.76 | 13,000 | Midazolam                   | IM                  |                           | 325 mg (0.025 mg/kg)            | 109 | [37] |
|           |                |          |      |        | Acepromazine                | IM                  |                           | 2000 mg (0.15 mg/kg)            |     |      |
|           |                |          |      |        | Xylazine                    | IV                  | Right pectoral fin vessel | 33,500 mg (2.6 mg/kg)           |     |      |
|           |                |          |      |        | KCl                         |                     | Near heart                | 150 mg/kg (2 mmol/kg)           |     |      |
| Mysticete | Minke whale    | Chemical | 3.04 | 276    | Midazolam                   | IM                  |                           | 0.14 mg/kg                      | 48  | [37] |
|           |                |          |      |        | Acepromazine                | IM, IV              |                           | 1.6 mg/kg                       |     |      |
|           |                |          |      |        | Xylazine                    | IM, IV, IC          |                           | 15.3 mg/kg                      |     |      |
|           |                |          |      |        | KCl                         | IC                  |                           | 168 mg/kg (2.2 mmol/kg)         |     |      |
| Mysticete | Minke whale    | Chemical | 5.8  |        | Barbiturates                | IV                  |                           |                                 |     | [42] |
| Mysticete | Minke whale    | Chemical | 2.84 |        | Diazepam                    | IM                  |                           | 20 mg                           |     | [43] |
|           |                |          |      |        | Sodium pentobarbital        | IH                  |                           | 70,200 mg                       |     |      |
|           |                |          |      |        | Phenytoin                   | IH                  |                           | 9000 mg                         |     |      |
| Mysticete | Minke whale    | Chemical | 2.93 | 214.8  | Meperidine (Meperidine HCl) | IM                  |                           | 100 mg (0.46 mg/kg), (25 mg/mL) | 31  | [44] |
|           |                |          |      |        | Pentobarbital sodium        | IC                  |                           | 13.65 g (63 mg/kg)              |     |      |

|            |                      |                                            |      |        |                                   |             |                              |                                            |      |      |
|------------|----------------------|--------------------------------------------|------|--------|-----------------------------------|-------------|------------------------------|--------------------------------------------|------|------|
| Mysticete  | Right whale          | Chemical,<br>Inhalation,<br>Exsanguination | 9.75 | 10,000 | Phenytoin sodium                  | IC          |                              | 1.75 g (8.1 mg/kg)                         | 123  | [37] |
|            |                      |                                            |      |        | Midazolam                         | Retrobulbar |                              | 90 mg (0.009 mg/kg)                        |      |      |
|            |                      |                                            |      |        | Diazepam                          | Retrobulbar |                              | 150 mg (0.015 mg/kg)                       |      |      |
|            |                      |                                            |      |        | Acepromazine                      | Retrobulbar |                              | 450 mg (0.045 mg/kg)                       |      |      |
|            |                      |                                            |      |        | Xylazine                          | Retrobulbar |                              | 13,000 mg (1.3 mg/kg)                      |      |      |
|            |                      |                                            |      |        | Medetomidine                      | Retrobulbar |                              | 22 mg (2.2 µg/kg)                          |      |      |
| Mysticete  | Southern Right whale | Chemical                                   | 14   | 40,000 | Isoflurane                        | Inhalation  |                              | 200 mL                                     | 2981 | [55] |
|            |                      |                                            |      |        | Xylazine                          | IM          | Tongue                       | 8000 mg (0.2 mg/kg), 19,800 mg (0.5 mg/kg) |      |      |
|            |                      |                                            |      |        | Midazolam                         | IM          | Tongue                       | 840 mg (0.021 mg/kg)                       |      |      |
|            |                      |                                            |      |        | Thiopental sodium in saline       | Inhalation  | Blowhole                     | 113 g in 2000 mL                           |      |      |
|            |                      |                                            |      |        | Chloral hydrate                   | Inhalation  | Blowhole                     | 500 g                                      |      |      |
|            |                      |                                            |      |        | Ketamine                          | IM          | Tongue                       | 99,000 mg (2.47 mg/kg)                     |      |      |
|            |                      |                                            |      |        | T61                               | IV          | Near heart                   | 750 mL                                     |      |      |
|            |                      |                                            |      |        | KCl                               | IV          | Near heart                   | 10,000 mL of 1 mmol                        |      |      |
| Odontocete | Sperm whale          | Chemical                                   | 6.1  |        | Barbiturate Beuthanasia-D         | IV          | Left pectoral fin            | 20 cc                                      | 5    | [58] |
|            |                      |                                            |      |        | Special Barbiturate Beuthanasia-D | IV          | Vein on dorsal side of fluke | 20 cc                                      |      |      |

|          |                     |                      |     |        |                                                   |               |                 |                         |      |
|----------|---------------------|----------------------|-----|--------|---------------------------------------------------|---------------|-----------------|-------------------------|------|
| Pinniped | Antarctic fur seals | Chemical             |     |        | Tiletamine hydrochloride, Zolazepam hydrochloride |               |                 | 1:1                     | [1]  |
| Pinniped | Bearded seal        | Chemical             | 1.8 | 92.8   | Telazol                                           | IV            | Epidural vein   |                         | [2]  |
| Pinniped | California sea lion | Chemical             |     |        | Xylazine hydrochloride                            | IM            |                 | 2.5 mL of 100 mg/mL     | [10] |
|          |                     |                      |     |        | Sodium pentobarbital                              | IC            |                 | 40 mL of 389 mg/mL      |      |
| Pinniped | California sea lion | Chemical             |     |        | Tiletamine Zolazepam (Telazol)                    | IM            |                 | 175 mg 1:1, 100 mg      | [11] |
|          |                     |                      |     |        | Pentobarbital                                     | IV, IC        |                 | 2730 mg                 |      |
| Pinniped | California sea lion | Chemical             |     |        | Pentobarbital                                     | IV            |                 |                         | [12] |
| Pinniped | California sea lion | Chemical             |     | 37     | Tiletamine-zolazepam                              | IM            |                 | 200 mg                  | [4]  |
|          |                     |                      |     |        | Pentobarbital, Phenytoin sodium                   | IV            | Subclavian vein | 10 mL of 39% and 5%     |      |
| Pinniped | California sea lion | Chemical, Inhalation |     |        | Telazol                                           | IM            |                 | 1.0 mg/kg               | [5]  |
|          |                     |                      |     |        | Metatomadine Isoflurane                           | IM Inhalation |                 | 0.04 mg/kg              |      |
| Pinniped | California sea lion | Chemical             |     |        | Barbiturate                                       |               |                 |                         | [50] |
| Pinniped | California sea lion | Chemical             |     |        | Pentobarbital sodium, Phenytoin sodium            | IV            | Subclavian vein | 1 mL/5 kg of 39% and 5% | [6]  |
| Pinniped | California sea lion | Chemical, Inhalation |     |        |                                                   |               |                 |                         | [60] |
| Pinniped | California sea lion | Chemical             |     | 13–168 | Pentobarbital                                     | IV            | Subclavian vein | 80 mg/kg                | [7]  |
| Pinniped | California sea lion | Chemical             |     |        | Pentobarbital sodium,                             | IV            | Subclavian vein | 1 mL/5 kg of 39% and 5% | [8]  |

|          |                     |                      |      |      |                                        |    |                                |                    |      |
|----------|---------------------|----------------------|------|------|----------------------------------------|----|--------------------------------|--------------------|------|
|          |                     |                      |      |      | Phenytoin sodium                       |    |                                |                    |      |
| Pinniped | California sea lion | Chemical             |      |      | Barbiturate                            |    |                                |                    | [9]  |
| Pinniped | Cape fur seal       | Chemical             | 1.93 | 182  | Sernylan                               | IM |                                | 500 mg             | [13] |
|          |                     |                      |      |      | Rompun                                 | IM |                                | 60 mg              |      |
|          |                     |                      |      |      | Scoline                                | IM |                                | 100 mg             |      |
| Pinniped | Grey seal           | Chemical             |      | 58.5 | Euthanyl                               |    |                                |                    | [21] |
| Pinniped | Grey seal           | Chemical             |      | 155  | Pentobarbital sodium (Euthasol)        | IV |                                | 70 mL              | [22] |
| Pinniped | Grey seal           | Chemical             |      | 19   | Pentobarbitone (Euthatal)              | IV | Extradural intravertebral vein | 150 mg/kg          | [23] |
| Pinniped | Grey seal           | Chemical             |      |      | Pentobarbital                          | IV |                                |                    | [24] |
| Pinniped | Grey seals          | Chemical             |      |      | T61                                    |    |                                | 0.3 mL/kg          | [31] |
| Pinniped | Harbor seal         | Chemical             |      |      | Pentobarbitone                         | IV |                                | 1900 mg            | [25] |
| Pinniped | Harbor seal         | Chemical             |      | 90   |                                        |    |                                |                    | [26] |
| Pinniped | Harbor seal         | Chemical             |      |      | Pentobarbital sodium, Phenytoin sodium | IV |                                | 5 mL of 39% and 5% | [27] |
| Pinniped | Harbor seal         | Chemical, Inhalation |      |      |                                        |    |                                |                    | [60] |
| Pinniped | Harbor seals        | Chemical             |      |      | Sodium pentobarbital                   | IV |                                | 0.5 mL/kg          | [28] |
| Pinniped | Harbor seals        | Chemical             |      |      | T61                                    |    |                                | 0.3 mL/kg          | [29] |
| Pinniped | Harbor seals        | Chemical             |      | 120  | Pentobarbital sodium, Phenytoin sodium | IV |                                | 10,140 mg          | [30] |
|          |                     |                      |      | 70   | Pentobarbital sodium, Phenytoin sodium | IV |                                | 2340 mg            |      |

|          |                        |                                            |      |      |                                           |    |                                 |                     |      |
|----------|------------------------|--------------------------------------------|------|------|-------------------------------------------|----|---------------------------------|---------------------|------|
|          |                        |                                            |      | 57   | Pentobarbital sodium,<br>Phenytoin sodium | IV |                                 | 8800 mg             |      |
|          |                        |                                            |      | 90.3 | Pentobarbital sodium,<br>Phenytoin sodium | IV |                                 | 5460 mg             |      |
| Pinniped | Harbor seals           | Chemical                                   |      |      | T61                                       |    |                                 | 0.3 mL/kg           | [31] |
| Pinniped | Harp seal              | Chemical                                   |      |      | Pentobarbital                             | IV | Extradural intravertebral vein  | 15 mL (240 mg/mL)   | [32] |
| Pinniped | Harp seal              | Ballistics,<br>Chemical,<br>Exsanguination |      |      | Barbiturate                               | IV |                                 | 30 mg/kg            | [33] |
| Pinniped | Harp seal              | Chemical,<br>Exsanguination                |      |      | Barbiturate                               | IV |                                 | 30 mg/kg            | [34] |
| Pinniped | Hooded seal            | Ballistics,<br>Chemical,<br>Exsanguination |      |      | Barbiturate                               | IV |                                 | 30 mg/kg            | [33] |
| Pinniped | Hooded seal            | Chemical,<br>Exsanguination                |      |      | Barbiturate                               | IV |                                 | 30 mg/kg            | [34] |
| Pinniped | Hooded seal            | Chemical,<br>Exsanguination                |      |      | Pentobarbital                             | IV | Extradural intravertebral vein  | 20 mg/kg            | [35] |
| Pinniped | New Zealand fur seal   | Chemical                                   | 1.56 | 47.5 | Barbiturates                              | IC |                                 |                     | [45] |
| Pinniped | Northern elephant seal | Chemical                                   |      | 42.5 | Pentobarbital,<br>Phenytoin sodium        | IV | Epidural venous sinus           | 10 mL of 39% and 5% | [4]  |
| Pinniped | Northern elephant seal | Chemical                                   |      | 60   | Pentobarbitone                            | IV | Extradural intravertebral sinus | 20 mL               | [46] |
| Pinniped | Northern elephant seal | Chemical                                   |      |      | Pentobarbitone                            | IV | Extradural intravertebral sinus | 20 mL               | [47] |
| Pinniped | Northern elephant seal | Chemical                                   |      | 37.5 | Pentobarbital                             | IV |                                 | 3.9 g               | [48] |



|          |                        |                         |     |                              |    |                   |      |
|----------|------------------------|-------------------------|-----|------------------------------|----|-------------------|------|
| Pinniped | Northern elephant seal | Chemical                | 196 | Pentobarbital<br>Beuthanasia | IV | Epidural<br>sinus | [49] |
| Pinniped | Northern elephant seal | Chemical                |     | Barbiturate                  |    |                   | [50] |
| Pinniped | Northern elephant seal | Chemical                |     | Pentobarbital                | IV | 389 mg/mL         | [51] |
| Pinniped | Northern elephant seal | Chemical,<br>Inhalation |     |                              |    |                   | [60] |
| Pinniped | Pacific Harbor seal    | Chemical                |     | Pentobarbital                | IV | 389 mg/mL         | [51] |
| Pinniped | Pinnipeds              | Chemical                |     | Barbiturate                  |    |                   | [14] |
| Ursid    | Polar bear             | Chemical                |     | Pentobarbital                |    |                   | [52] |

**Table S2.** Marine mammal euthanasia via physical methods (ballistics and explosives), including details of methods and time to death (TTD) as reported in the peer-reviewed literature between 1980 and 2020.

| Taxon                    | Species                    | Method                  | Length of<br>animal<br>(m) | Mass of<br>animal<br>(kg) | Firearm             | Projectile<br>characteristics       | Orientation                | Explosives | TTD<br>(mins) | Ref  |
|--------------------------|----------------------------|-------------------------|----------------------------|---------------------------|---------------------|-------------------------------------|----------------------------|------------|---------------|------|
| Delphinid                | Bottlenose<br>dolphin      | Ballistics              | 1.3–2.7                    |                           | 0.300               | 180 g blunt non-<br>deforming solid | Dorso-ventral              |            |               | [66] |
| Delphinid                | Common dolphin             | Ballistics              | 2.5–5                      |                           | 12 gauge<br>shotgun | 28 g slug,<br>buckshot              | Lateral, Dorso-<br>ventral |            |               | [61] |
| Delphinid                | Common dolphin             | Ballistics              |                            |                           |                     |                                     |                            |            |               | [62] |
| Delphinid                | Common dolphin             | Ballistics              | 1.8                        |                           | 0.308               | 180 g blunt non-<br>deforming solid | Dorso-ventral              |            |               | [66] |
| Delphinid<br>(Blackfish) | False Killer whale         | Ballistics,<br>Chemical |                            |                           |                     |                                     |                            |            |               | [16] |
| Delphinid<br>(Blackfish) | Long-finned pilot<br>whale | Ballistics              | 2.5–5                      |                           | 12 gauge<br>shotgun | 28 g slug,<br>buckshot              | Lateral, Dorso-<br>ventral |            |               | [61] |
| Delphinid<br>(Blackfish) | Long-finned pilot<br>whale | Ballistics              |                            |                           |                     |                                     |                            |            |               | [64] |
| Delphinid<br>(Blackfish) | Long-finned pilot<br>whale | Ballistics              |                            |                           | .30-06              |                                     | Lateral, Dorso-<br>ventral |            |               | [65] |
| Delphinid<br>(Blackfish) | Risso's dolphin            | Ballistics              | 2.7                        |                           | 0.308               | 180 g blunt non-<br>deforming solid | Dorso-ventral              |            |               | [66] |

|           |                       |                                      |         |       |            |                                 |               |                                              |      |
|-----------|-----------------------|--------------------------------------|---------|-------|------------|---------------------------------|---------------|----------------------------------------------|------|
| Kogiid    | Pygmy sperm whale     | Ballistics                           | 1.8–2.5 |       | .300, .308 | 180 g blunt non-deforming solid | Dorso-ventral |                                              | [66] |
| Mysticete | Humpback whale        | Ballistics, Chemical                 |         |       | 0.577      | 3 rounds                        | Pericranial   |                                              | [36] |
| Mysticete | Humpback whale        | Explosives                           | 9.11    | 10000 |            |                                 | Dorso-ventral | 6 x AN60                                     | 0    |
|           |                       |                                      | 10.5    | 15000 | 0.300      | 5 rounds                        | Dorso-ventral | 5 X 125g Powergel magnum                     |      |
|           |                       |                                      | 9.8     | 15000 |            |                                 |               | 14 X 125g Powergel magnum                    | 0    |
|           |                       |                                      | 12.7    |       |            |                                 |               | 22X 125g Powergel magnum and 2X 50g Boosters | 0    |
|           |                       |                                      | 9.5     | 15000 |            |                                 |               | 15X 125g Powergel magnum                     | 0    |
| Mysticete | Humpback whale        | Ballistics                           | 4.2–4.3 |       | 0.300      | 180 g blunt non-deforming solid | Dorso-ventral |                                              | [66] |
| Pinniped  | Harp seal             | Ballistics, Chemical, Exsanguination |         |       |            |                                 |               |                                              | [33] |
| Pinniped  | Hooded seal           | Ballistics, Chemical, Exsanguination |         |       |            |                                 |               |                                              | [33] |
| Ziphiid   | Cuvier's beaked whale | Ballistics                           | 4.2     |       | 0.300      | 180 g blunt non-deforming solid | Dorso-ventral |                                              | [66] |

**Table S3.** Cetacean species reported as euthanised using chemical methods and respective chemical information and time to death (TTD) as reported by the United Kingdom (UK) to the International Whaling Commission (IWC) between 2014 and 2018.

| Taxon group | Species                      | Number individuals euthanised | Chemical agent | Injection route | Dose reported | TTD (mins) |
|-------------|------------------------------|-------------------------------|----------------|-----------------|---------------|------------|
| Delphinid   | Atlantic white-sided dolphin | 1                             | Pentobarbitone | Intravenous     | 100 mL        |            |
| Delphinid   | Bottlenose dolphin           | 1                             | Somulose       | Intravenous     | 50 mL         |            |
| Delphinid   | Bottlenose dolphin           | 1                             | Pentoject      | Intravenous     | 3 x 50 mL     | <2         |

|                       |                      |   |                                                    |                 |                    |    |
|-----------------------|----------------------|---|----------------------------------------------------|-----------------|--------------------|----|
| Delphinid             | Common dolphin       | 1 | Pentobarbital                                      | Intravenous     | 40 mL at 200 mg/mL |    |
| Delphinid             | Common dolphin       | 1 | Pentobarbitone                                     | Intravenous     | 30 mL              |    |
| Delphinid             | Common dolphin       | 1 | Pentobarbitone 20%                                 | Intravenous     | 30 mL              | 2  |
| Delphinid             | Common dolphin       | 1 | Euthatal                                           | Intravenous     | 50 mL              | <1 |
| Delphinid             | Common dolphin       | 1 | Pentobarbital                                      | Intravenous     | 50 mL              | <2 |
| Delphinid             | Common dolphin       | 1 | Euthatal                                           | Intravenous     | 50 mL              |    |
| Delphinid             | Common dolphin       | 1 | Pentobarbitone                                     | Intravenous     | 50 mL              |    |
| Delphinid             | Striped dolphin      | 1 | Pentobarbitone                                     | Intravenous     | 50 mL              | 2  |
| Delphinid             | Striped dolphin      | 1 | Barbiturate                                        | Not provided    | Not provided       |    |
| Delphinid             | Striped dolphin      | 1 | Pentobarbiturate                                   | Intrathoracic   | 30 mL              |    |
| Delphinid             | White-beaked dolphin | 1 | Pentobarbitone                                     | Intravenous     | 100 mL             |    |
| Delphinid             | White-beaked dolphin | 1 | Pentobarbital sodium                               | Intravenous     | 100 mL             | <3 |
| Delphinid (Blackfish) | Risso's dolphin      | 1 | Pentobarbitone                                     | Intramuscular   | 100 mL             |    |
| Phocoenid             | Harbour porpoise     | 1 | Euthatal                                           | Intravenous     | 20 mL              |    |
| Phocoenid             | Harbour porpoise     | 1 | Pentobarbital                                      | Intravenous     | 25 mL              |    |
| Phocoenid             | Harbour porpoise     | 1 | Barbiturate                                        | Intravenous     | 20 mL              |    |
| Phocoenid             | Harbour porpoise     | 1 | Dolethal                                           | Intracardiac    | 40 mL              |    |
| Phocoenid             | Harbour porpoise     | 1 | Euthatal                                           | Intraperitoneal | 20 mL              |    |
| Phocoenid             | Harbour porpoise     | 1 | Dolethal                                           | Intravenous     | 15 mL              | <2 |
| Phocoenid             | Harbour porpoise     | 1 | Pentobarbiturate, Sedation: medetomidine, ketamine | Intracardiac    | 20 mL              |    |
| Phocoenid             | Harbour porpoise     | 1 | Pentoject                                          | Intravenous     | 25 mL              | 2  |

**Table S4.** Cetacean species reported as euthanised using ballistics methods and respective ballistics information and time to death (TTD) as reported by the United Kingdom (UK) to the International Whaling Commission (IWC) between 2014 and 2018.

| Taxon group | Species              | Number individuals euthanised | Firearm | Number shots | Projectile characteristic | Orientation discharge | TTD (mins) |
|-------------|----------------------|-------------------------------|---------|--------------|---------------------------|-----------------------|------------|
| Delphinid   | White-beaked dolphin | 1                             | Unknown |              |                           |                       |            |

|                       |                         |          |         |   |            |         |                  |
|-----------------------|-------------------------|----------|---------|---|------------|---------|------------------|
| Delphinid (Blackfish) | Long-finned pilot whale | Multiple | .243    | 1 | 100 grain  | Lateral |                  |
| Delphinid (Blackfish) | Long-finned pilot whale | 1        | Unknown |   |            |         | Presumed instant |
| Delphinid (Blackfish) | Long-finned pilot whale | 1        | Unknown |   |            |         | Presumed instant |
| Delphinid (Blackfish) | Long-finned pilot whale | 1        | Unknown |   |            |         | Presumed instant |
| Delphinid (Blackfish) | Long-finned pilot whale | 1        | .308    | 3 |            | Lateral | Presumed instant |
| Delphinid (Blackfish) | Long-finned pilot whale | 1        | Shotgun |   |            |         |                  |
| Delphinid (Blackfish) | Long-finned pilot whale | 1        | .270    |   | Soft point |         |                  |
| Delphinid (Blackfish) | Risso's dolphin         | 1        | .243    | 2 |            |         | Presumed instant |
| Mysticete             | Minke whale             | 1        | Unknown | 3 |            |         | Presumed instant |
| Phocoenid             | Harbour porpoise        | 1        | .22     | 1 |            |         | Presumed instant |
| Ziphiid               | Cuvier's beaked whale   | 1        | Unknown | 2 |            |         | Presumed instant |

**Table S5.** Cetacean species reported as euthanised using ballistics methods and respective ballistics information and time to death (TTD) as reported by New Zealand (NZ) to the International Whaling Commission (IWC) between 2007 and 2020.

| Taxon group | Species            | Number individuals euthanised | Firearm | Number shots | Projectile design | Projectile grain | Number reported as TTD instant | Number presumed instant | TTD (mins) |
|-------------|--------------------|-------------------------------|---------|--------------|-------------------|------------------|--------------------------------|-------------------------|------------|
| Delphinid   | Bottlenose dolphin | 1                             | .357    | 1            |                   |                  | 1                              |                         |            |
| Delphinid   | Bottlenose dolphin | 1                             | Shotgun | 2            |                   |                  | 1                              |                         |            |
| Delphinid   | Bottlenose dolphin | 1                             | Shotgun | 1            |                   |                  | 1                              |                         |            |
| Delphinid   | Bottlenose dolphin | 1                             | .243    | 1            |                   |                  | 1                              |                         |            |
| Delphinid   | Common dolphin     | 1                             | .22     |              |                   |                  | 1                              |                         |            |

|                       |                              |    |                               |   |            |        |    |     |
|-----------------------|------------------------------|----|-------------------------------|---|------------|--------|----|-----|
| Delphinid             | Common dolphin               | 1  | .223                          | 2 |            |        |    | 1   |
| Delphinid             | Common dolphin               | 1  | .308                          | 1 |            |        |    | 0.3 |
| Delphinid             | Common dolphin               | 1  | .308                          | 1 |            |        | 1  |     |
| Delphinid             | Common dolphin               | 1  | .308                          | 1 |            |        | 1  |     |
| Delphinid             | Common dolphin               | 1  | .303                          | 1 |            |        | 1  |     |
| Delphinid             | Dusky dolphin                | 1  | .223                          | 3 |            |        | 1  |     |
| Delphinid             | Dusky dolphin                | 1  | .22                           | 2 |            |        | 1  |     |
| Delphinid             | Dusky dolphin                | 1  | Unknown                       |   |            |        |    |     |
| Delphinid             | Hector's dolphin             | 1  | Boltgun                       |   |            |        | 1  |     |
| Delphinid             | Southern Right whale dolphin | 1  | .30-06                        |   |            |        |    |     |
| Delphinid             | Striped dolphin              | 1  | .243                          | 1 |            |        | 1  |     |
| Delphinid (Blackfish) | Long-finned pilot whale      | 48 | .30-06                        | 1 |            |        | 48 |     |
| Delphinid (Blackfish) | Long-finned pilot whale      | 48 | .303                          | 1 |            |        | 48 |     |
| Delphinid (Blackfish) | Long-finned pilot whale      | 1  | .30-06                        | 2 | soft point | 150 gm | 1  |     |
| Delphinid (Blackfish) | Long-finned pilot whale      | 32 | .30-06                        | 1 | soft point | 150 gm | 32 |     |
| Delphinid (Blackfish) | Long-finned pilot whale      | 2  | .30-06                        | 2 | soft point | 150 gm |    | 2   |
| Delphinid (Blackfish) | Long-finned pilot whale      | 27 | .30-06                        | 1 | soft point | 150 gm | 27 |     |
| Delphinid (Blackfish) | Long-finned pilot whale      | 1  | .30-06                        | 2 | soft point | 150 gm | 1  |     |
| Delphinid (Blackfish) | Long-finned pilot whale      | 1  | .243                          |   |            |        | 1  |     |
| Delphinid (Blackfish) | Long-finned pilot whale      | 29 | .30-06                        |   |            |        | 28 | 0.5 |
| Delphinid (Blackfish) | Long-finned pilot whale      | 6  | Bushmaster Semiauto 7.62x39SP | 3 |            |        | 6  | 0.5 |

|                       |                           |    |                          |     |    |     |
|-----------------------|---------------------------|----|--------------------------|-----|----|-----|
| Delphinid (Blackfish) | Long-finned pilot whale   | 1  | Bolt-action rifle 7mm-08 | 5   | 1  | 0.5 |
| Delphinid (Blackfish) | Long-finned pilot whale   | 4  | .303                     |     |    | 4   |
| Delphinid (Blackfish) | Long-finned pilot whale   | 43 | .308                     | 3   | 35 | 4   |
| Delphinid (Blackfish) | Long-finned pilot whale   | 11 | .30-06                   | 2   | 10 | 3   |
| Delphinid (Blackfish) | Long-finned pilot whale   | 8  | .303                     |     | 8  |     |
| Delphinid (Blackfish) | Long-finned pilot whale   | 19 | .270                     | 1-3 | 2  | <2  |
| Delphinid (Blackfish) | Long-finned pilot whale   | 7  | Rifle 6.5x55             | 3   |    | 2   |
| Delphinid (Blackfish) | Long-finned pilot whale   | 25 | .30-06                   |     | 23 |     |
| Delphinid (Blackfish) | Long-finned pilot whale   | 1  | .303                     |     |    |     |
| Delphinid (Blackfish) | Long-finned pilot whale   | 1  | Shotgun                  | 2   |    | 3   |
| Delphinid (Blackfish) | Long-finned pilot whale   | 10 | .30-06                   |     | 10 |     |
| Delphinid (Blackfish) | Long-finned pilot whale   | 71 | .303                     | 3   | 70 | 1   |
| Delphinid (Blackfish) | Pilot whale (unknown sp.) | 8  | .308                     | 3   | 5  | 3   |
| Delphinid (Blackfish) | Pilot whale (unknown sp.) | 30 | .30-06                   | 3   | 27 | 0.3 |
| Delphinid (Blackfish) | Pilot whale (unknown sp.) | 19 | .303                     | 1   | 19 |     |
| Delphinid (Blackfish) | Pygmy killer whale        | 7  | .308                     | 2   |    | 7   |
| Delphinid (Blackfish) | Pygmy killer whale        | 3  | Unknown                  | 3   |    |     |
| Delphinid (Blackfish) | Short-finned pilot whale  | 3  | .30-06                   | 1   | 3  |     |
| Kogiid                | Pygmy sperm whale         | 1  | .303                     | 1   |    |     |

|           |                   |   |        |   |            |        |   |     |
|-----------|-------------------|---|--------|---|------------|--------|---|-----|
| Kogiid    | Pygmy sperm whale | 2 | .30-06 | 3 |            |        | 1 |     |
| Kogiid    | Pygmy sperm whale | 1 | .308   | 3 |            |        | 1 |     |
| Kogiid    | Pygmy sperm whale | 7 | .308   | 3 |            |        | 7 |     |
| Kogiid    | Pygmy sperm whale | 1 | .303   | 1 | soft point | 150 gm | 1 |     |
| Kogiid    | Pygmy sperm whale | 2 | .30-06 | 1 | soft point | 150 gm | 2 |     |
| Kogiid    | Pygmy sperm whale | 6 | .30-06 |   | soft point | 140 gm | 6 |     |
| Kogiid    | Pygmy sperm whale | 1 | .303   |   | soft point | 150 gm | 1 |     |
| Kogiid    | Pygmy sperm whale | 3 | .303   |   |            |        | 3 |     |
| Kogiid    | Pygmy sperm whale | 2 | .308   | 1 |            |        | 2 |     |
| Kogiid    | Pygmy sperm whale | 1 | .30-06 |   |            |        | 1 |     |
| Kogiid    | Pygmy sperm whale | 1 | .308   | 1 |            |        | 1 |     |
| Kogiid    | Pygmy sperm whale | 2 | .303   | 1 |            |        | 2 |     |
| Kogiid    | Pygmy sperm whale | 8 | .30-06 |   |            |        | 8 |     |
| Kogiid    | Pygmy sperm whale | 2 | .303   |   |            |        | 2 |     |
| Kogiid    | Pygmy sperm whale | 1 | .270   | 2 |            |        | 1 |     |
| Kogiid    | Pygmy sperm whale | 1 | .30-06 |   |            |        | 1 |     |
| Kogiid    | Pygmy sperm whale | 2 | .303   | 1 |            |        | 2 |     |
| Kogiid    | Pygmy sperm whale | 4 | .30-06 | 1 |            |        | 3 |     |
| Kogiid    | Pygmy sperm whale | 2 | .303   | 1 |            |        | 2 |     |
| Kogiid    | Pygmy sperm whale | 2 | .30-06 |   |            |        | 1 | 2   |
| Kogiid    | Pygmy sperm whale | 3 | .303   |   |            |        | 2 | 1   |
| Kogiid    | Pygmy sperm whale | 1 | .300   | 2 |            |        |   | 1   |
| Kogiid    | Pygmy sperm whale | 2 | .303   | 1 |            |        |   |     |
| Mysticete | Bryde's whale     | 1 | .270   | 1 |            |        | 1 |     |
| Mysticete | Dwarf minke whale | 1 | .30-06 | 3 |            |        | 1 |     |
| Mysticete | Humpback          | 1 | .303   |   |            |        |   | 720 |
| Mysticete | Humpback          | 1 | .416   | 4 |            |        |   |     |
| Mysticete | Minke whale       | 1 | .308   | 1 |            |        | 1 |     |
| Mysticete | Minke whale       | 1 | .308   | 1 |            |        | 1 |     |
| Mysticete | Minke whale       | 1 | .270   | 3 |            |        |   | 0.3 |

|           |                       |   |            |   |            |        |    |
|-----------|-----------------------|---|------------|---|------------|--------|----|
| Mysticete | Minke whale           | 1 | .30-06     | 3 |            |        | 1  |
| Mysticete | Sei whale             | 1 | .30-06     | 1 |            |        | 1  |
| Ziphiid   | Arnoux's beaked whale | 2 | .303       | 1 |            |        | 2  |
| Ziphiid   | Cuvier's beaked whale | 1 | Unknown    |   |            |        |    |
| Ziphiid   | Cuvier's beaked whale | 1 | .30-06     | 1 |            |        | 1  |
| Ziphiid   | Cuvier's beaked whale | 1 | .30-06     | 6 |            |        | 35 |
| Ziphiid   | Gray's beaked whale   | 1 | .308       | 1 |            |        | 1  |
| Ziphiid   | Gray's beaked whale   | 1 | .44 magnum | 1 |            |        | 1  |
| Ziphiid   | Gray's beaked whale   | 1 | .44 magnum | 1 |            |        | 1  |
| Ziphiid   | Gray's beaked whale   | 1 | .303       | 2 |            |        | 1  |
| Ziphiid   | Gray's beaked whale   | 1 | .303       | 1 |            |        | 1  |
| Ziphiid   | Strap-toothed whale   | 1 | .308       | 2 |            |        | 1  |
| Ziphiid   | Strap-toothed whale   | 1 | .308       | 2 | soft point | 180 gm | 1  |

## References

1. Arnould, J.P.Y.; Boyd, I.L.; Speakman, J.R. Measuring the Body Composition of Antarctic Fur Seals (*Arctocephalus Gazella*): Validation of Hydrogen Isotope Dilution. **1996**, *69*, 93–116, doi:10.1086/physzool.69.1.30164202.
2. Gosselin, J.; Boily, F. Unusual Southern Occurrence of a Juvenile Bearded Seal, *Erignathus Barbatus*, in the St Lawrence Estuary, Canada. *Marine Mammal Science* **1994**, *10*, 480–483.
3. Davis, D.A.; Mondo, K.; Stern, E.; Annor, A.K.; Murch, S.J.; Coyne, T.M.; Brand, L.E.; Niemeyer, M.E.; Sharp, S.; Bradley, W.G.; et al. Cyanobacterial Neurotoxin BMAA and Brain Pathology in Stranded Dolphins. *PLoS One* **2019**, *14*, e0213346–e0213346, doi:10.1371/journal.pone.0213346.
4. Dennison, S.; Gulland, F.; Haulena, M.; De Moraes, H.; Colegrove, K. Urate Nephrolithiasis in a Northern Elephant Seal (*Mirounga Angustirostris*) and a California Sea Lion (*Zalophus Californianus*). *Journal of Zoo and Wildlife Medicine* **2007**, *38*, 114–20, doi:10.1638/05-121.1.
5. Mulsow, J.; Reichmuth, C. Electrophysiological Assessment of Temporal Resolution in Pinnipeds. *Aquatic Mammals* **2007**, *33*, 122–131, doi:10.1578/am.33.1.2007.122.
6. Dennison, S.; Haulena, M.; Williams, D.C.; Dawson, J.; Yandell, B.S.; Gulland, F.M.D. Determination of a Sedative Protocol for Use in California Sea Lions (*Zalophus Californianus*) with Neurologic Abnormalities Undergoing Electroencephalographic Examination. *Journal of Zoo and Wildlife Medicine* **2008**, *39*, 542–547, doi:10.1638/2007-0077.1.



7. Sarran, D.; Greig, D.J.; Rios, C.A.; Zabka, T.S.; Gulland, F.M.D. Evaluation of Aqueous Humor as a Surrogate for Serum Biochemistry in California Sea Lions (*Zalophus Californianus*). *Aquatic Mammals* **2008**, *34*, 157–165, doi:10.1578/am.34.2.2008.157.
8. Gulland, F.; Hall, A.; Greig, D.; Frame, E.; Colegrove, K.; Booth, R.; Wasser, S.; Scott-Moncrieff, J. Evaluation of Circulating Eosinophil Count and Adrenal Gland Function in California Sea Lions Naturally Exposed to Domoic Acid. *Journal of American Veterinary Medical Association* **2012**, *241*, 943–949.
9. Sawyer, E.K.; Turner, E.C.; Kaas, J.H. Somatosensory Brainstem, Thalamus, and Cortex of the California Sea Lion (*Zalophus Californianus*). *Journal of Comparative Neurology* **2016**, *524*, 1957–75, doi:10.1002/cne.23984.
10. Fauquier, D.A.; Gulland, F.M.D.; Trupkiewicz, J.G.; Spraker, T.R.; Lowenstine, L.J. Coccidioidomycosis in Free-Living California Sea Lions (*Zalophus Californianus*) in Central California. *Journal of Wildlife Diseases* **1996**, *32*, 707–710.
11. Fauquier, D.; Gulland, F.; Haulena, M.; Dailey, M.; Rietcheck, R.; Lipscomb, T. Meningoencephalitis in Two Stranded California Sea Lions (*Zalophus Californianus*) Caused by Aberrant Trematode Migration. *Journal of Wildlife Diseases* **2004**, *40*, 816–819.
12. Cameron, S.; Lopez, A.; Glabman, R.; Abrams, E.; Johnson, S.; Field, C.; Gulland, F.M.D.; Buckmaster, P.S. Proportional Loss of Parvalbumin-Immunoreactive Synaptic Boutons and Granule Cells from the Hippocampus of Sea Lions with Temporal Lobe Epilepsy. *Journal of Comparative Neurology* **2019**, *527*, 2341–2355, doi:10.1002/cne.24680.
13. De Graaf, A.; Shaughnessy, P.; McCully, R.; Verster, A. Occurrence of *Taenia Solium* in a Cape Fur Seal (*Arctocephalus Pusillus*). *Onderstepoort Journal of Veterinary Research* **1980**, *47*, 119–120.
14. Bernaldo de Quiros, Y.; Hartwick, M.; Rotstein, D.S.; Garner, M.M.; Bogomolni, A.; Greer, W.; Niemeyer, M.E.; Early, G.; Wenzel, F.; Moore, M. Discrimination between Bycatch and Other Causes of Cetacean and Pinniped Stranding. *Dis Aquat Organ* **2018**, *127*, 83–95, doi:10.3354/dao03189.
15. Glanville, E.; Bartlett, P.; Berrow, S. Common Dolphin *Delphinus Delphis* (L.). *The Irish Naturalists' Journal* **2003**, *27*, 241–242.
16. Kirkman, S.P.; Meÿr, M.A.; Thornton, M. False Killer Whale *Pseudorca Crassidens* Mass Stranding at Long Beach on South Africa 's Cape Peninsula, 2009. *African Journal of Marine Science* **2010**, *32*, 167–170, doi:10.2989/1814232x.2010.481168.
17. Daoust, P.; Ortenburger, A. Successful Euthanasia of a Juvenile Fin Whale. *Canadian Veterinary Journal* **2001**, *42*, 127–129.
18. Dunn, J.L. Multiple-Agent Euthanasia of a Juvenile Fin Whale, *Balanoptera Physalus*. *Marine Mammal Science* **2006**, *22*, 1004–1007, doi:10.1111/j.1748-7692.2006.00073.x.
19. Dailey, M.; Gulland, F.; Lowenstine, L.J.; Silvagni, P.; Howard, D. Prey, Parasites and Pathology Associated with the Mortality of a Juvenile Gray Whale (*Eschrichtius Robustus*) Stranded along the Northern California Coast. *Diseases of Aquatic Organisms* **2000**, *42*, 111–117.
20. Gulland, F.; Pérez-Cortés, H.; Urban, J.; Rojas-Bracho, L.; Ylitalo, G.; Weir, J.; Norman, S.; Muto, M.; Rugh, D.; Johnson, C.; et al. *Eastern North Pacific Gray Whale (Eschrichtius Robustus) Unusual Mortality Event, 1999-2000*; US Dep. Commer. NOAA, 2005; p. 33;.
21. Frouin, H.; Ménard, L.; Measures, L.; Brousseau, P.; Fournier, M. T Lymphocyte-Proliferative Responses of a Grey Seal (*Halichoerus Grypus*) Exposed to Heavy Metals and PCBs in Vitro. *Aquatic Mammals* **2010**, *36*, 365–371, doi:10.1578/am.36.4.2010.365.
22. Sosa, M.; Gamble, K.C.; Delaski, K.; Righton, A. Clinical Challenge: Systemic *Rhizopus Microsporus* Infection with Renal Cavitation in a Grey Seal (*Halichoerus Grypus*). *Journal of Zoo and Wildlife Medicine* **2013**, *44*, 1134–8, doi:10.1638/2013-0089R.1.
23. Barnett, J.; Riley, P.; Cooper, T.; Linton, C.; Wessels, M. Mycotic Encephalitis in a Grey Seal (*Halichoerus Grypus*) Pup Associated with *Rhizomucor Pusillus* Infection. *Veterinary Record Case Reports* **2014**, *2*, doi:10.1136/vetreccr-2014-000115.
24. Silpa, M.A.C.; Thornton, S.M.; Cooper, T.; Hedley, J. Prevalence of Presenting Conditions in Grey Seal Pups (*Halichoerus Grypus*) Admitted for Rehabilitation. *Veterinary Science* **2015**, *2*, 1–11, doi:10.3390/vetsci2010001.
25. Stamper, M.; FMD, G.; Spraker, T. Leptospirosis in Rehabilitated Pacific Harbor Seals from California. *Journal of Wildlife Diseases* **1998**, *34*, 407–410.
26. Lapointe, J.; Gulland, F.; Haines, D.; Barr, B.; Duignan, P.J. Placentitis Due to *Coxiella Burnetii* in a Pacific Harbor Seal (*Phoca Vitulina Richardsi*). *Journal of Veterinary Diagnostic Investigation* **1999**, *11*, 541–543.

27. Dennison, S.E.; Forrest, L.J.; Fleetwood, M.L.; Gulland, F.M.D. Concurrent Occipital Bone Malformation and Atlantoaxial Subluxation in a Neonatal Harbor Seal (*Phoca Vitulina*). *Journal of Zoo and Wildlife Medicine* **2009**, *40*, 385–388.
28. Duignan, P.J.; Saliki, J.T.; Aubin, D.J.St.; Early, G.; Sadove, S.; House, J.A.; Kovacs, K.; Geraci, J.R. *EPIZOOTIOLOGY OF MORBILLIVIRUS INFECTION IN NORTH AMERICAN HARBOR SEALS (PHOCA VITULINA) AND GRAY SEALS (HALICHOERUS GRYPUS)*; BIOONE, 1995; Vol. 31.
29. Bodewes, R.; Rubio García, A.; Wiersma, L.C.M.; Getu, S.; Beukers, M.; Schapendonk, C.M.E.; van Run, P.R.W.A.; van de Bildt, M.W.G.; Poen, M.J.; Osinga, N.; et al. Novel B19-Like Parvovirus in the Brain of a Harbor Seal. *PLOS ONE* **2013**, *8*, e79259, doi:10.1371/journal.pone.0079259.
30. Flower, J.E.; Gamble, K.C.; Stone, M.; Lyons, J.A.; Maganti, R.J.; Tuomi, P.A.; Olds, J.E.; Sims, M.A.; Gauger, P.; Tuttle, A.D. Esophageal Squamous Cell Carcinoma in Six Harbor Seals (*Phoca Vitulina* Spp.). *Journal of Zoo and Wildlife Medicine* **2014**, *45*, 620–31, doi:10.1638/2012-0218R1.1.
31. Bodewes, R.; Hapsari, R.; Rubio Garcia, A.; Sanchez Contreras, G.J.; van de Bildt, M.W.; de Graaf, M.; Kuiken, T.; Osterhaus, A.D. Molecular Epidemiology of Seal Parvovirus, 1988–2014. *PLoS One* **2014**, *9*, e112129, doi:10.1371/journal.pone.0112129.
32. Daoust, P.; Haines, D.; Thorsen, J.; Duignan, P.J.; Geraci, JR. Phocine Distemper in a Harp Seal (*Phoca Groenlandica*) from the Gulf of St. Lawrence, Canada. *Journal of Wildlife Diseases* **1993**, *29*, 114–117.
33. Desforges, J.P.; Levin, M.; Jasperse, L.; De Guise, S.; Eulaers, I.; Letcher, R.J.; Acquarone, M.; Nordoy, E.; Folkow, L.P.; Hammer Jensen, T.; et al. Effects of Polar Bear and Killer Whale Derived Contaminant Cocktails on Marine Mammal Immunity. *Environmental Science Technology* **2017**, *51*, 11431–11439, doi:10.1021/acs.est.7b03532.
34. Sonne, C.; Andersen-Ranberg, E.; Rajala, E.L.; Agerholm, J.S.; Bonefeld-Jorgensen, E.; Desforges, J.P.; Eulaers, I.; Jenssen, B.M.; Koch, A.; Rosing-Asvid, A.; et al. Seroprevalence for Brucella Spp. in Baltic Ringed Seals (*Phoca hispida*) and East Greenland Harp (*Pagophilus Groenlandicus*) and Hooded (*Cystophora Cristata*) Seals. *Veterinary Immunology and Immunopathology* **2018**, *198*, 14–18, doi:10.1016/j.vetimm.2018.02.005.
35. Larsen, A.K.; Nymo, I.H.; Boysen, P.; Tryland, M.; Godfroid, J. Entry and Elimination of Marine Mammal Brucella Spp. by Hooded Seal (*Cystophora Cristata*) Alveolar Macrophages in Vitro. *PLoS One* **2013**, *8*, e70186, doi:10.1371/journal.pone.0070186.
36. Bischoff, K.; Jaeger, R.; Ebel, J.G. An Unusual Case of Relay Pentobarbital Toxicosis in a Dog. *J Med Toxicol* **2011**, *7*, 236–239, doi:10.1007/s13181-011-0160-8.
37. Harms, C.A.; McLellan, W.A.; Moore, M.J.; Barco, S.G.; Clarke, E.O., 3rd; Thayer, V.G.; Rowles, T.K. Low-Residue Euthanasia of Stranded Mysticetes. *Journal of Wildlife Diseases* **2014**, *50*, 63–73, doi:10.7589/2013-03-074.
38. Glezer, I.; Morgane, P. Ultrastructure of Synapses and Golgi Analysis of Neurons in Neocortex of the Lateral Gyrus (Visual Cortex) of the Dolphin and Pilot Whale. *Brain Research Bulletin* **1990**, *24*, 401–427.
39. White, R.; Shea, D.; Schlezinger, J.; Hahn, M.; Stegeman, J. In Vitro Metabolism of Polychlorinated Biphenyl Congeners by Beluga Whale (*Delphinapterus Leucas*) and Pilot Whale (*Globicephala Melas*) and Relationship to Cytochrome P450 Expression. *Comparative Biochemistry and Physiology* **2000**, *126*, 267–284.
40. Brownlow, A.; Baily, J.; Dagleish, M.; Deaville, R.; Foster, G.; Jensen, S.; Krupp, E.; Law, R.; Penrose, R.; Perkins, M.; et al. *Investigation into the Long-Finned Pilot Whale Mass Stranding Event, Kyle of Durness, 22nd July 2011*; Department for Environment Food & Rural Affairs (DEFRA) Scottish Marine Animal Stranding Scheme; Scotland, 2015;
41. Phillips, A.C.N.; Suepaul, R. Nasitrema Species: A Frequent Culprit in Melon-Headed Whale (*Peponocephala Electra*) Strandings in Trinidad. *Aquatic Mammals* **2017**, *43*, 547–557, doi:10.1578/am.43.5.2017.547.
42. Tarpley, R.; Marwitz, S. Plastic Debris Ingestion by Cetaceans along the Texas Coast Two Case Reports. *Aquatic Mammals* **1993**, *19.2*, 93–98.
43. Hohn, A.A.; Rotstein, D.S.; Harms, C.A.; Southall, B.L. *Multispecies Mass Stranding of Pilot Whales (Globicephala Macrorhynchus), Minke Whale (Balaenoptera Acutorostrata), and Dwarf Sperm Whales (Kogia Sima) in North Carolina on 15-16 January 2005*; Report on Marine Mammal Unusual Mortality Event UMESE0501Sp; NOAA, 2006;
44. Harms, C.A.; Lovewell, G.N.; Rotstein, D.S. Presumed Hyperglycemic Cataracts in a Live-Stranded Minke Whale (*Balaenoptera Acutorostrata*) Calf. *Marine Mammal Science* **2008**, *24*, 388–397, doi:10.1111/j.1748-7692.2007.00182.x.

45. Donahoe, S.L.; Rose, K.; Slapeta, J. Multisystemic Toxoplasmosis Associated with a Type II-like *Toxoplasma Gondii* Strain in a New Zealand Fur Seal (*Arctocephalus Forsteri*) from New South Wales, Australia. *Veterinary Parasitology* **2014**, *205*, 347–53, doi:10.1016/j.vetpar.2014.07.022.
46. Gulland, F.M.D.; Werner, L.; O'Neill, S.; Lowenstine, L.J.; Trupkiewicz, J.; Smith, D.; Royal, B.; Strubel, I. Baseline Coagulation Assay Values for Northern Elephant Seals (*Mirounga Angustirostris*), and Disseminated Intravascular Coagulation in This Species. *Journal of Wildlife Diseases* **1996**, *32*, 536–540.
47. Trupkiewicz, J.G.; Gulland, F.M.D.; Lowenstine, L.J. Congenital Defects in Northern Elephant Seals Stranded along the Central California Coast. *Journal of Wildlife Diseases* **1997**, *33*, 220–225.
48. Haulena, M.; Buckles, E.; Gulland, F.; Lawrence, J.; Wong, A.; Jang, S.; Christopher, M.; Lowenstine, L. Systemic Mycosis Caused by *Scedosporium Apiospermum* in a Stranded Northern Elephant Seal (*Mirounga Angustirostris*) Undergoing Rehabilitation. *Journal of Zoo and Wildlife Medicine* **2002**, *33*, 166–171, doi:10.1638/1042-7260(2002)033[0166:Smcbsa]2.0.Co;2.
49. Fauquier, D.; Gulland, F.; Haulena, M.; Spraker, T. Biliary Adenocarcinoma in a Stranded Northern Elephant Seal (*Mirounga Angustirostris*). *Journal of Wildlife Diseases* **2003**, *39*, 723–726.
50. Turner, E.C.; Sawyer, E.K.; Kaas, J.H. Optic Nerve, Superior Colliculus, Visual Thalamus, and Primary Visual Cortex of the Northern Elephant Seal (*Mirounga Angustirostris*) and California Sea Lion (*Zalophus Californianus*). *J Comp Neurol* **2017**, *525*, 2109–2132, doi:10.1002/cne.24188.
51. Elson-Riggins, J.G.; Al-Banna, L.; Platzer, E.G.; Kaloshian, I. Characterization of *Otostrongylus Circumlitus* from Pacific Harbor and Northern Elephant Seals. *Journal of Parasitology* **2001**, *87*, 73–78, doi:10.1645/0022-3395(2001)087[0073:Coocfp]2.0.Co;2.
52. Farley, S.D.; Robbins, C.T. Development of Two Methods to Estimate Body Composition of Bears. *Canadian Journal of Zoology* **1994**, *72*, 220–226, doi:10.1139/z94-029.
53. Clua, E.; Manire, C.; Garrigue, C. Biological Data of Pygmy Killer Whale (*Feresa Attenuata*) from a Mass Stranding in New Caledonia (South Pacific) Associated with Hurricane Jim in 2006. *Aquatic Mammals* **2014**, *40*, 162–172, doi:10.1578/AM.40.2.2014.162.
54. Rousselet, E.; Stolen, M.; Durden, W.N.; Jablonski, T.; Stacy, N.I.; Rotstein, D.S. Bilateral Polycystic Kidneys and Focal Renal Cystadenoma in a Pygmy Sperm Whale (*Kogia Breviceps*). *Journal of Wildlife Diseases* **2019**, *55*, 258–261, doi:10.7589/2018-01-019.
55. Kolesnikovas, C.; Groch, K.; Groch, K.; Moraes, A.; Flores, P.; Pretto, D.; Freitas, R.; Gaidzinski, M.; Moreira, L. Euthanasia of an Adult Southern Right Whale (*Eubalaena Australis*) in Brazil. *Aquatic Mammals* **2012**, *38*, 317–321, doi:10.1578/am.38.3.2012.317.
56. Miller, M.; Conrad, P.; James, E.R.; Packham, A.; Toy-Choutka, S.; Murray, M.J.; Jessup, D.; Grigg, M. Transplacental Toxoplasmosis in a Wild Southern Sea Otter (*Enhydra Lutris Nereis*). *Veterinary Parasitology* **2008**, *153*, 12–8, doi:10.1016/j.vetpar.2008.01.015.
57. St Leger, J.A.; Righton, A.L.; Nilson, E.M.; Fascetti, A.J.; Miller, M.A.; Tuomi, P.A.; Goertz, C.E.; Puschner, B. Vitamin A Deficiency and Hepatic Retinol Levels in Sea Otters, *Enhydra Lutris*. *Journal of Zoo and Wildlife Medicine* **2011**, *42*, 98–104, doi:10.1638/2010-0010.1.
58. Peterson, J.C.; Hoggard, W. First Sperm Whale (*Physeter Macrocephalus*) Record in Mississippi. *Gulf Research Reports* **1996**, *9*, doi:10.18785/grr.0903.10.
59. Thayer, V.G.; Harms, C.A.; Rittmaster, K.A.; Rotstein, D.S.; Hairr, J.E. A North Carolina Stranding of a White-Beaked Dolphin (*Lagenorhynchus Albirostris*), Family Delphinidae: A New Southerly Record. *Aquatic Mammals* **2018**, *44*, 32–38, doi:10.1578/am.44.1.2018.32.
60. Reichmuth, C.; Mulsow, J.; Finneran, J.J.; Houser, D.S.; Supin, A.Y. Measurement and Response Characteristics of Auditory Brainstem Responses in Pinnipeds. *Aquatic Mammals* **2007**, *33*, 132–150, doi:10.1578/am.33.1.2007.132.
61. Blackmore, D.K.; Madie, P.; Bowling, M.C.; Nutman, A.; Davies, A.S.; McLeod, W.R.; Taylor, J.; Degen, M. The Use of a Shotgun for Euthanasia of Stranded Cetaceans. *New Zealand Veterinary Journal* **1995**, *43*, 158–9, doi:10.1080/00480169.1995.35878.
62. Stockin, K.A.; Duignan, P.J.; Roe, W.D.; Meynier, L.; Alley, M.; Fettermann, T. Causes of Mortality in Stranded Common Dolphin (*Delphinus Sp.*) from New Zealand Waters between 1998 and 2008. *Pacific Conservation Biology* **2009**, *15*, 217–227.
63. Coughran, D.K.; Stiiles, I.; Mawson, P. Euthanasia of Beached Humpback Whales Using Explosives. *Journal of Cetacean Research and Management* **2012**, *12*, 137–144.

64. Ogle, M. Managing the Welfare of Marine Mammals at Mass Strandings in Golden Bay, New Zealand. In *Marine Mammal Welfare; Animal Welfare*; Springer International Publishing: New York, USA; 2017; pp. 137–146 ISBN 978-3-319-46993-5.
65. Hunter, S.; Ogle, R.; Kirk, E. The Mass Stranding Event of Long-Finned Pilot Whales, *Globocephalus Melas*, at Golden Bay in February 2017. *Kokako* **2017**, 24, 27–36.
66. Hampton, J.; Mawson, P.; Coughran, D.; Vitali, S. Validation of the Use of Firearms for Euthanising Stranded Cetaceans. *Journal of Cetacean Research Management* **2014**, 14, 117–123.
